# Supplementary material
Source: publisher figshare collection journal article supplement (https://acs.figshare.com/ndownloader/files/4041073)
Supplement: Supplementary file 1 [file 4041073]

# Molecular Dynamics Simulation and Characterization of Graphene-Cellulose Nanocomposites

*R. Rahman<sup>†</sup>, J. T. Foster<sup>†,‡</sup> and A. Haque<sup>¶\*</sup>*

*<sup>†</sup>Center for Simulation, Visualization and Real-Time Prediction (SiViRT), The University of Texas and San Antonio, San Antonio, TX 78249.*

*<sup>‡</sup>Department of Mechanical Engineering, The University of Texas and San Antonio, San Antonio, TX 78249.*

*<sup>¶</sup>Department of Aerospace Engineering and Mechanics, The University of Alabama, Tuscaloosa, AL 35401.*

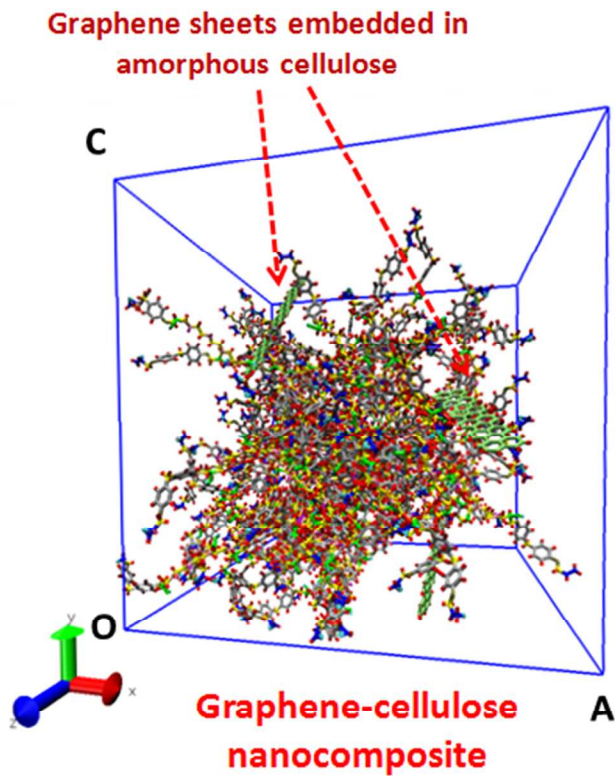

### Research highlights

- Adding 1%-3% graphene enhances the Young's modulus of graphene-cellulose nanocomposites significantly.
- Dispersed graphenes in cellulose lead to better stiffness.
- Graphene with larger aspect ratio has stronger non-bonded interaction with cellulose at the graphene-cellulose interface.
